# Supplementary material for: Comprehensive DNA methylation analysis of tissue of origin of plasma cell-free DNA by methylated CpG tandem amplification and sequencing (MCTA-Seq)
Source: PubMed Central journal article supplement (PMC6591962; doi:10.1186/s13148-019-0689-y), 2019-06-24

Figure S1

A

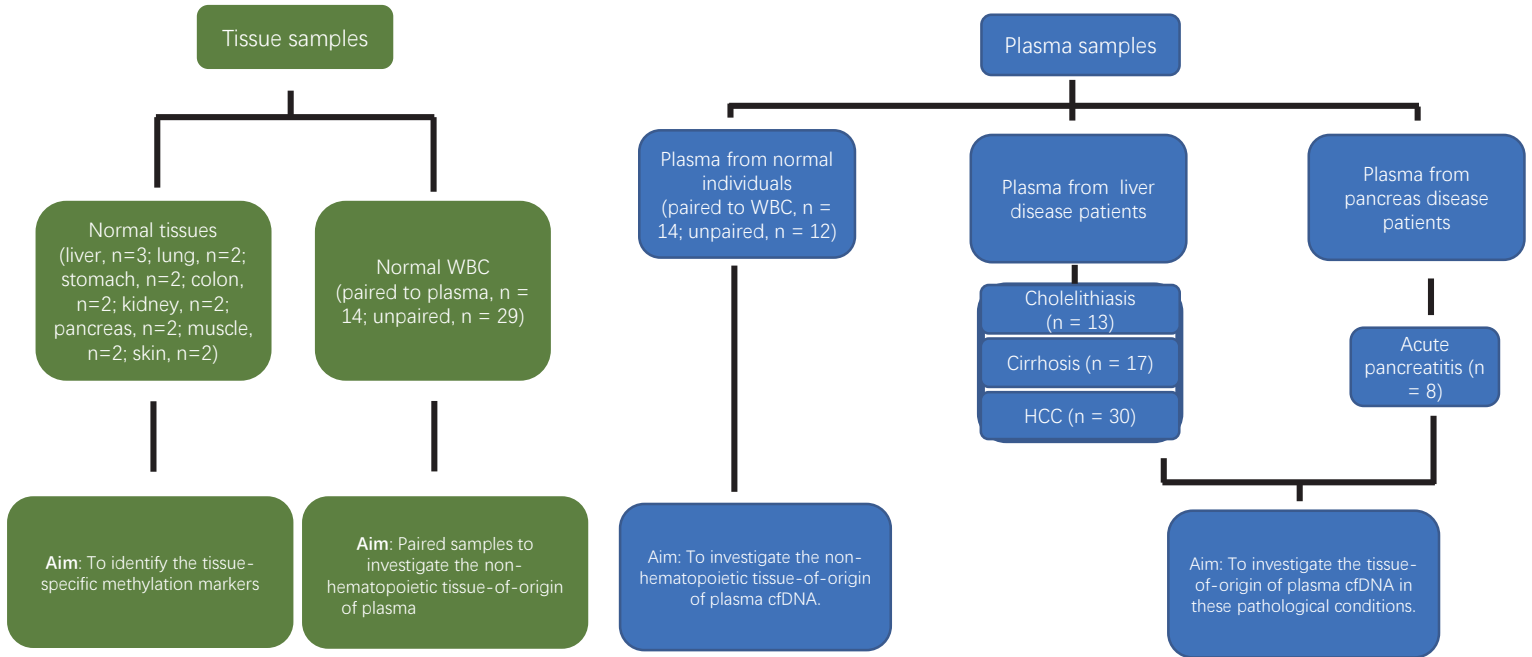

Figure S2

A

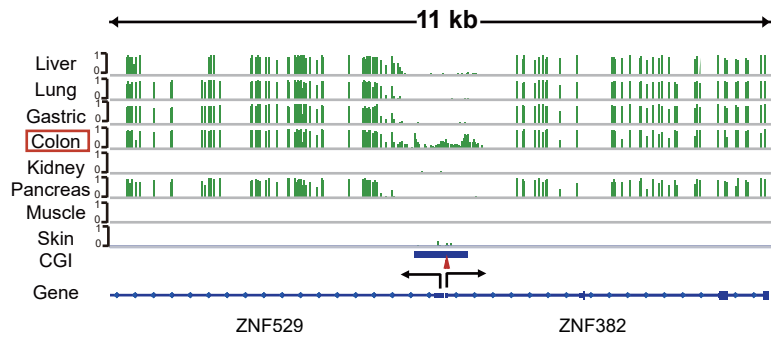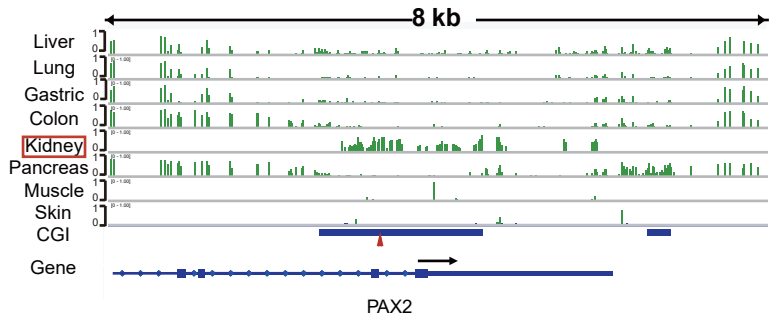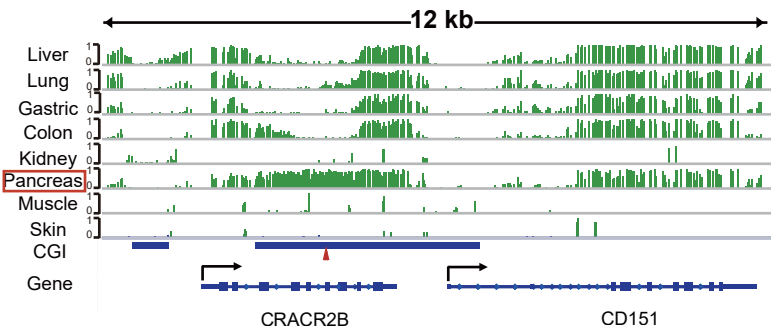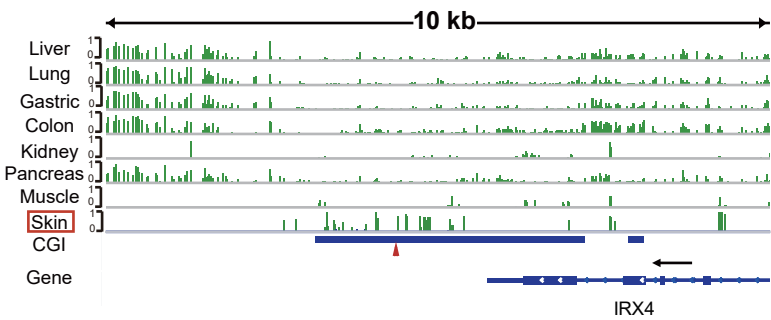

Figure S3

A

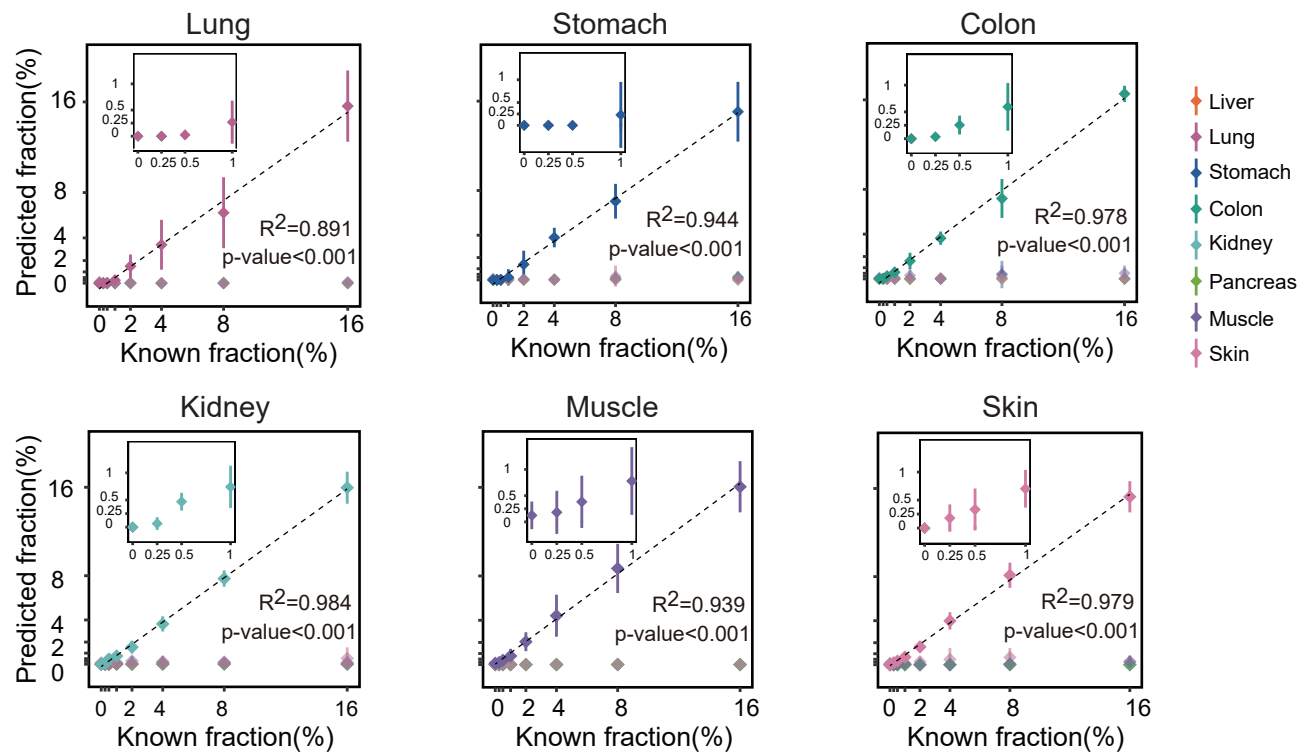

Figure S4

A

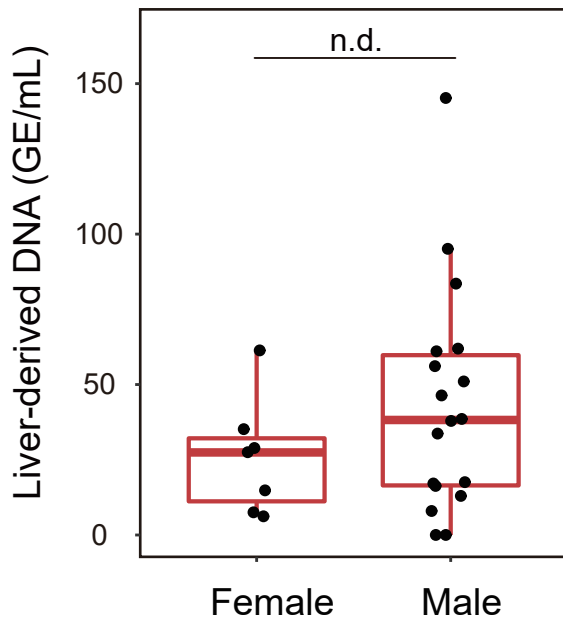

B

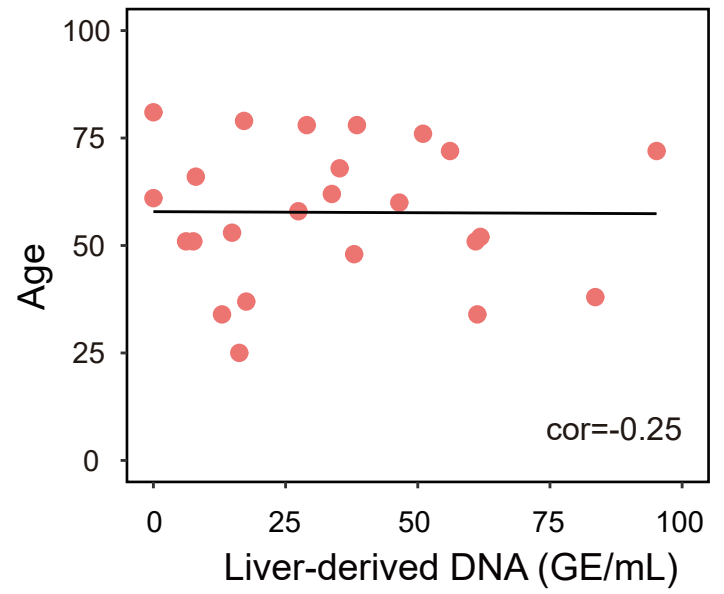

Figure S5

A

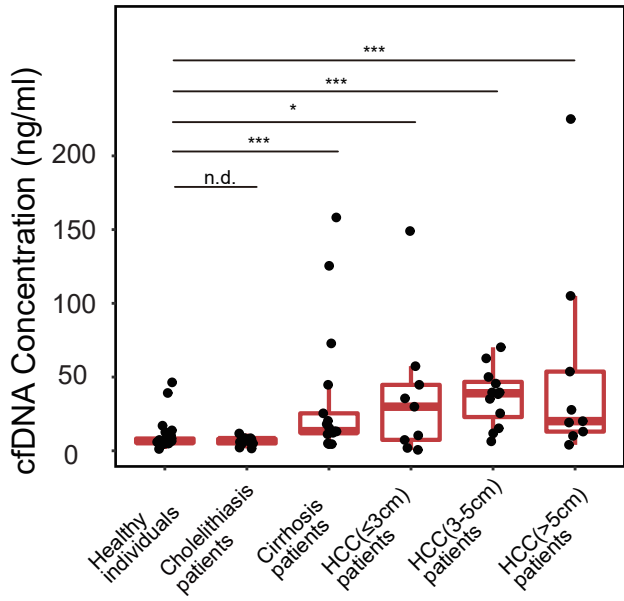

B

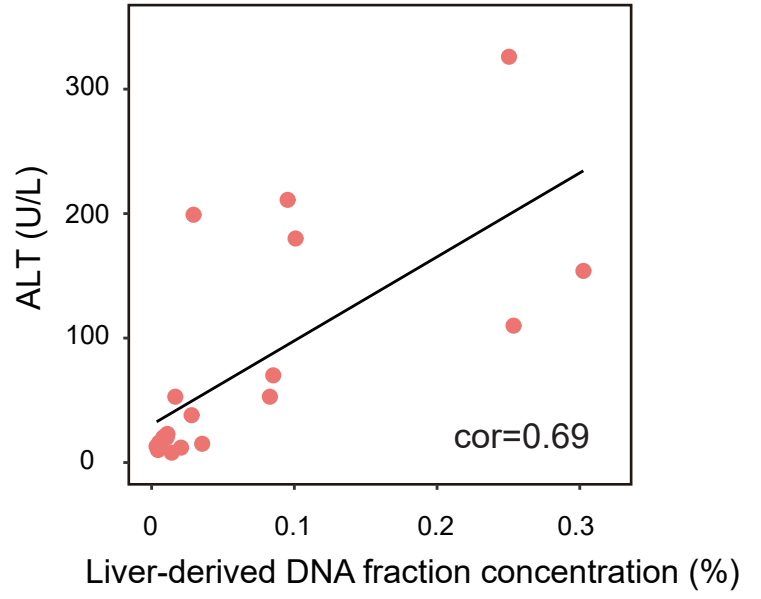

Figure S6

A

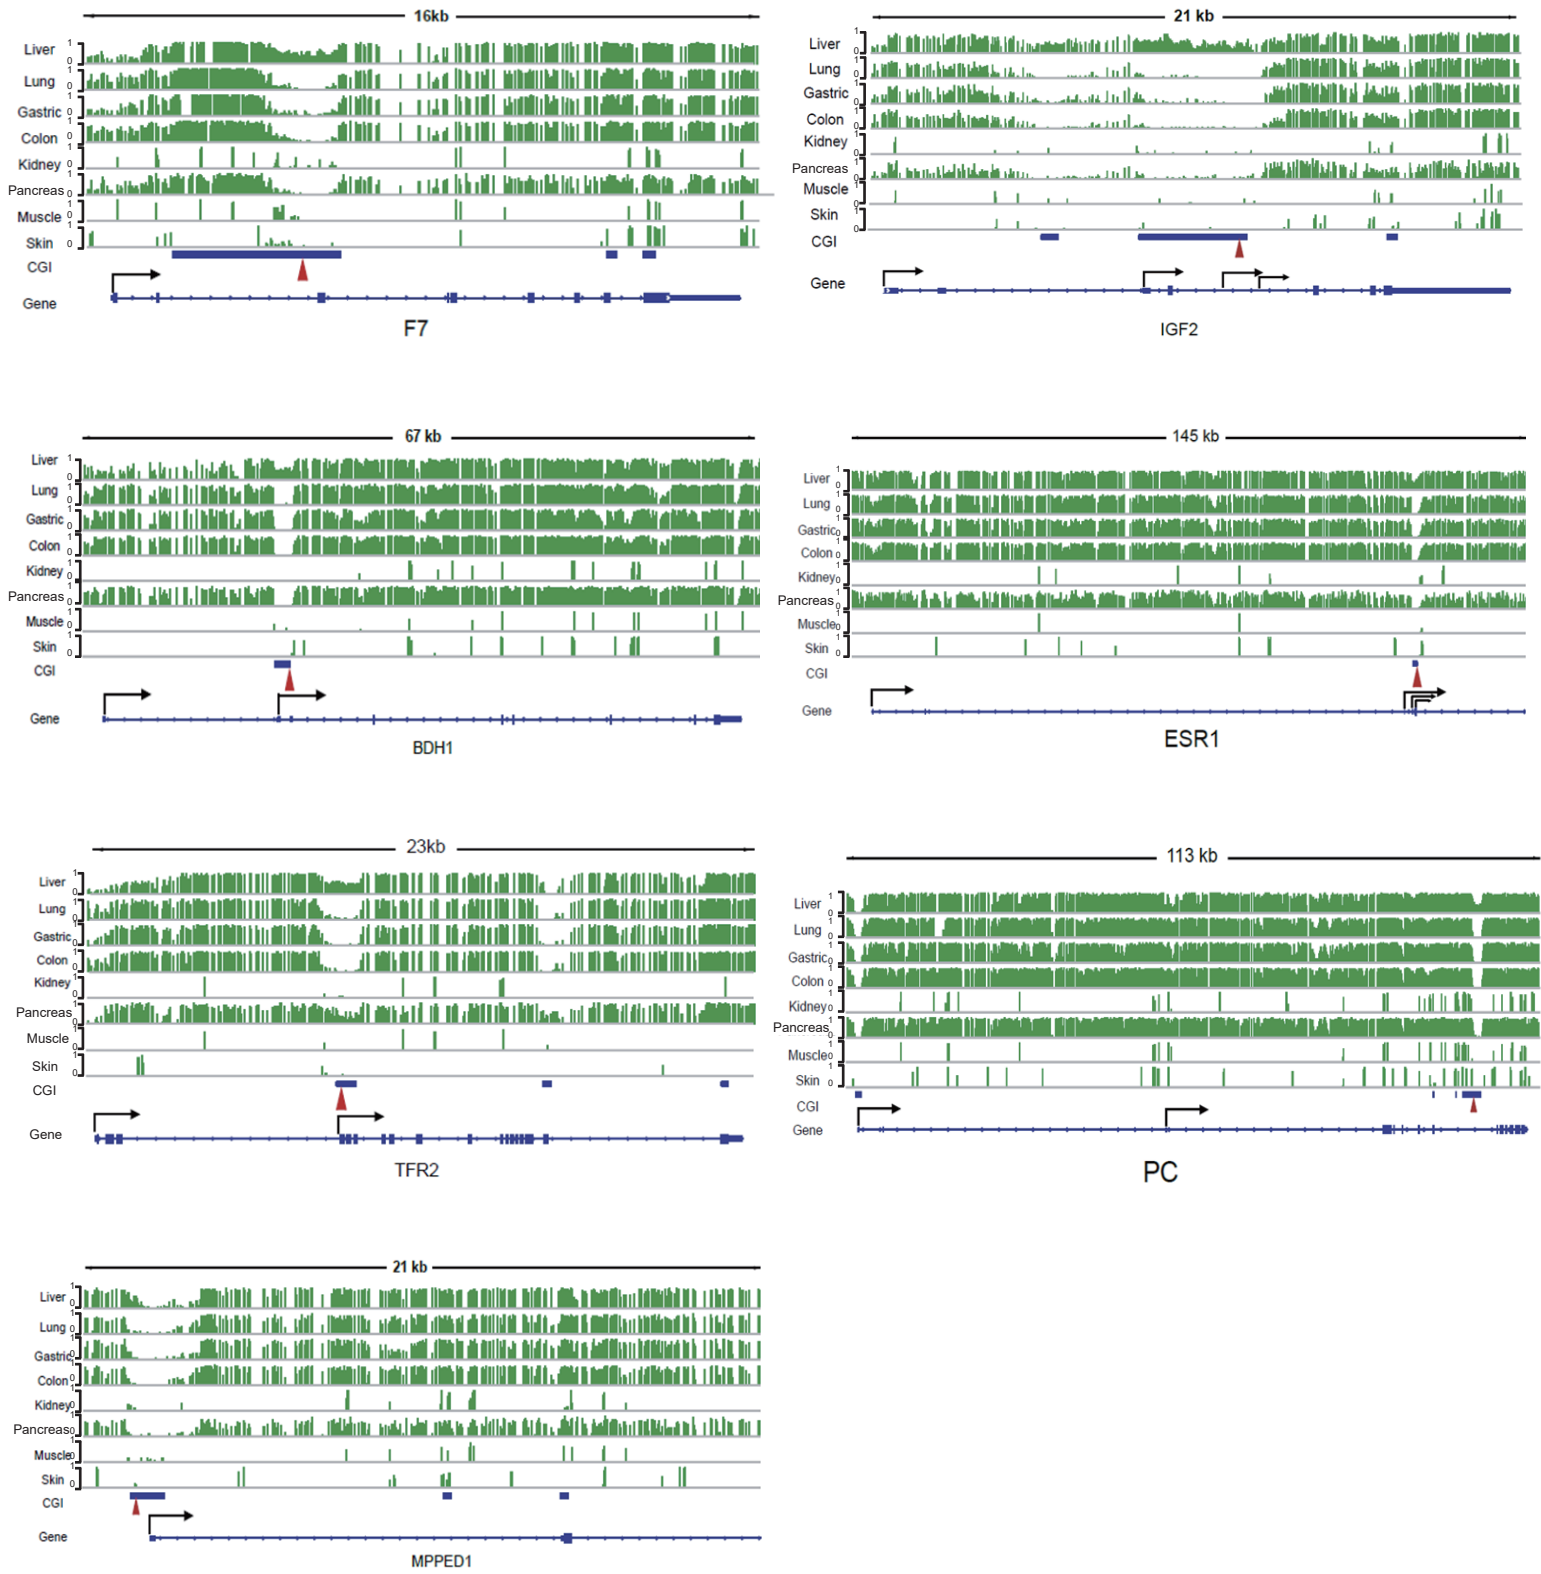

Supplement: 13148_2019_689_MOESM1_ESM.pdf [file 13148_2019_689_MOESM1_ESM.pdf]
